# Supplementary material for: Comparative genomics: Dominant coral-bacterium Endozoicomonas acroporae metabolizes dimethylsulfoniopropionate (DMSP)
Source: PubMed Central journal article supplement (PMC7174347; doi:10.1038/s41396-020-0610-x), 2020-02-13

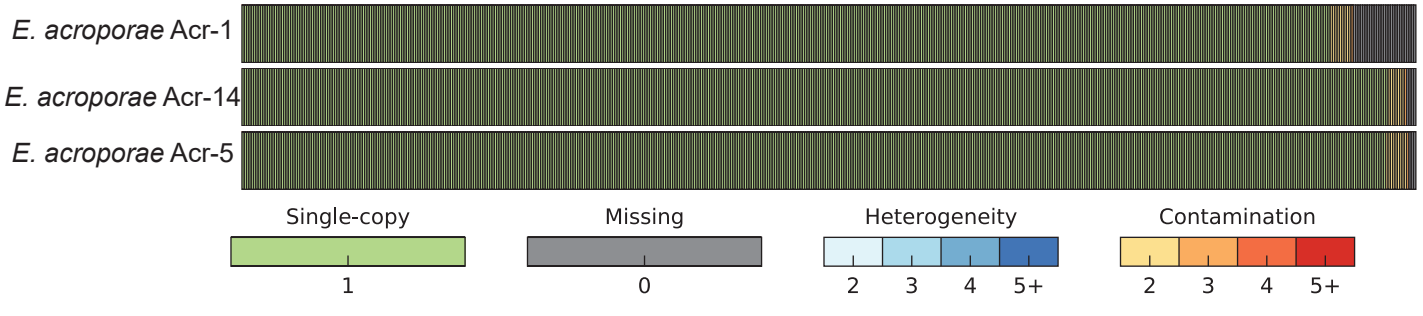

Supplement: 41396_2020_610_MOESM3_ESM.pdf [file 41396_2020_610_MOESM3_ESM.pdf]
